# Supplementary material for: Probing Medin Monomer Structure and its Amyloid Nucleation Using 13C-Direct Detection NMR in Combination with Structural Bioinformatics
Source: PubMed Central journal article supplement (PMC5361114; doi:10.1038/srep45224), 2017-03-22
Supplement: srep45224-s1.pdf [file srep45224-s1.pdf]

## Supplementary Information

### Probing Medin Monomer Structure and its Amyloid Nucleation Using $^{13}\text{C}$ -Direct Detection NMR in Combination with Structural Bioinformatics

Hannah A. Davies, Daniel J. Rigden, Marie M. Phelan and Jillian Madine

**Table S1. Detailed parameter sets for all NMR experiments employed in this work.** \* set by Bruker using constant (cnst) 22.

|                                                         | EXPERIMENT     |                      |            |            |           |
|---------------------------------------------------------|----------------|----------------------|------------|------------|-----------|
|                                                         | SOFAST<br>HMQC | $^{13}\text{C}$ HSQC | H(N)HA     | CON        | CACO      |
| <b>Pulse programme</b>                                  | sfhmqcf3gpph   | hsqcctetgpsisp       | hanhgpwg3d | c_con_iasq | c_caco.ia |
| <b><math>^1\text{H}</math> spectrometer field (MHz)</b> | 800            | 800                  | 800        | 600        | 600       |
| <b>Number of scans</b>                                  | 32             | 16                   | 16         | 160        | 64        |
| <b>Spectral width direct dimension (ppm)</b>            | 15.98          | 13.95                | 13.95      | 10.00      | 40.06     |
| <b>Spectral width indirect dimension (ppm)</b>          | 20.30          | 20.00                | 2.60       | 20.31      | 19.00     |
| <b>FID resolution indirect dimension (Hz)</b>           | 19.27          | 36.60                | 32.51      | 13.70      | 14.32     |
| <b>Direct offset (ppm)</b>                              | 4.64           | 4.68                 | 4.71       | 170.50     | 54.00*    |
| <b>Indirect offset (ppm)</b>                            | 117.65         | 57.5                 | 4.71       | 117.65     | 170.50    |
| <b>Experiment duration (hours)</b>                      | 0.25           | 1.25                 | 0.75       | 11.5       | 8         |

**Table S2. Secondary structure propensities obtained from chemical shift data.** Change in chemical shift ( $\Delta C'$ ,  $\Delta C\alpha$  and  $\Delta H\alpha$ ) between median backbone assignment and predicted random coil chemical shifts calculated using neighbour corrected Intrinsically Disordered Protein Library (ncIDP)<sup>1</sup> and CCPN<sup>2</sup>. ncIDP results are generated using 3 different chemical libraries as shown. Values consistent with  $\beta$ -strand and  $\alpha$ -helix are shown in red and blue respectively, shaded according to increasing propensity values. The fourth column for each library reports 10, 20 or 50% deviation towards either  $\alpha$ -helix or  $\beta$ -strand from random coil chemical shift values as reported in Wishart and Sykes<sup>3</sup> when two out of the three backbone shifts were in agreement. Residues where three or more consecutive residues have greater than 10% structure propensity have coloured boxes. A graphical representation of the data in column 4 is shown in Figure 2d.

|    | aa | Tamiola, Acar and Mulder <sup>1</sup> |                  |                  | Wang and Jardetzky <sup>4</sup> |                  |                  | Schwarzinger et al. <sup>5</sup> |                  |                  | CCPN <sup>2</sup> |                  |                  |       |       |            |             |
|----|----|---------------------------------------|------------------|------------------|---------------------------------|------------------|------------------|----------------------------------|------------------|------------------|-------------------|------------------|------------------|-------|-------|------------|-------------|
|    |    | $\Delta C'$                           | $\Delta C\alpha$ | $\Delta H\alpha$ | $\Delta C'$                     | $\Delta C\alpha$ | $\Delta H\alpha$ | $\Delta C'$                      | $\Delta C\alpha$ | $\Delta H\alpha$ | $\Delta C'$       | $\Delta C\alpha$ | $\Delta H\alpha$ |       |       |            |             |
| 1  | R  |                                       |                  |                  |                                 |                  |                  |                                  |                  |                  |                   |                  | -0.15            | -1.32 | 0.14  | 20 $\beta$ |             |
| 2  | L  | -0.52                                 | --               | 0.38             | 20 $\beta$                      | -0.1             | --               | 0.29                             |                  | -1.01            | --                | 0.28             | 50 $\beta$       | -0.93 | --    | 0.3        | 50 $\beta$  |
| 3  | D  | -1.07                                 | 3.92             | 0.03             |                                 | -0.72            | 4.18             | -0.08                            | 20 $\alpha$      | 0.01             | 5.27              | -0.24            | 50 $\alpha$      | 0.09  | 5.28  | -0.23      | 50 $\alpha$ |
| 4  | K  | --                                    | --               | --               |                                 | --               | --               | --                               |                  | --               | --                | --               |                  | --    | --    | --         |             |
| 5  | Q  | -0.17                                 | -0.03            | 0.11             | 10 $\beta$                      | 0.09             | 0.07             | 0.07                             |                  | -0.4             | -0.17             | -0.04            | 10 $\beta$       | -0.27 | -0.12 | -0.02      |             |
| 6  | G  | -0.2                                  | 0.04             | --               |                                 | -0.42            | -0.32            | --                               | 20 $\beta$       | -0.63            | -0.08             | --               |                  | -0.33 | -0.02 | --         |             |
| 7  | N  | 1.1                                   | 0.99             | 0.04             | 20 $\alpha$                     | 1.5              | 1.27             | -0.06                            | 20 $\alpha$      | 0.76             | 0.9               | -0.08            | 20 $\alpha$      | 0.88  | 0.92  | -0.07      | 20 $\alpha$ |
| 8  | F  | -0.63                                 | -0.36            | 0.09             | 20 $\beta$                      | -0.2             | -0.08            | 0.11                             | 10 $\beta$       | -1               | -0.5              | 0.01             | 20 $\beta$       | -0.89 | -0.47 | 0.03       | 20 $\beta$  |
| 9  | N  | 0.5                                   | 0.07             | 0.15             |                                 | 0.09             | -0.14            | 0.08                             | 10 $\beta$       | -0.24            | -0.24             | 0.02             | 10 $\beta$       | 0.05  | -0.26 | 0.11       | 10 $\beta$  |
| 10 | A  | -0.62                                 | 0.01             | 0.06             | 10 $\beta$                      | 0.29             | 0.12             | -0.05                            | 10 $\alpha$      | -0.5             | -0.16             | -0.03            | 10 $\beta$       | -0.2  | -0.12 | 0.03       |             |
| 11 | W  | 2.11                                  | 0.31             | 0.03             | 10 $\alpha$                     | 0.14             | 0.18             | -0.07                            |                  | -0.39            | 0.31              | -0.09            | 10 $\alpha$      | -0.25 | 0.32  | -0.06      | 10 $\alpha$ |
| 12 | V  | -0.26                                 | -0.22            | 0.12             | 10 $\beta$                      | -0.02            | -0.12            | -0.13                            |                  | -0.7             | -0.51             | -0.06            | 20 $\beta$       | -0.67 | -0.53 | -0.06      | 20 $\beta$  |
| 13 | A  | -0.11                                 | 0.33             | -0.16            | 10 $\alpha$                     | 0.36             | 0.58             | -0.26                            | 20 $\alpha$      | -0.21            | 0.22              | -0.27            |                  | 0.04  | 0.28  | -0.1       | 10 $\alpha$ |
| 14 | G  | -0.28                                 | -0.02            | --               |                                 | -0.31            | -0.14            | --                               | 10 $\beta$       | -0.49            | -0.15             | --               | 10 $\beta$       | -0.18 | -0.08 | --         |             |
| 15 | S  | -0.47                                 | 0.05             | 0.15             | 10 $\beta$                      | 0.1              | 0.21             | 0.07                             |                  | -0.63            | -0.23             | 0.09             | 20 $\beta$       | -0.61 | -0.21 | 0.09       | 20 $\beta$  |
| 16 | Y  | -0.08                                 | 0.11             | 0.01             |                                 | 0.42             | 0.16             | -0.02                            |                  | -0.47            | -0.4              | -0.06            | 20 $\beta$       | -0.38 | -0.32 | -0.05      | 20 $\beta$  |
| 17 | G  | 0.59                                  | 0.39             | --               | 10 $\alpha$                     | -0.01            | -0.02            | --                               |                  | -0.26            | -0.12             | --               |                  | -0.12 | -0.08 | --         |             |
| 18 | N  | 0.02                                  | 0.22             | 0.07             |                                 | 0.35             | 0.34             | 0.02                             | 10 $\alpha$      | -0.53            | 0.06              | -0.09            |                  | -0.35 | 0.06  | -0.04      |             |
| 19 | D  | -0.07                                 | 0.23             | 0.02             |                                 | 0.4              | 0.21             | -0.03                            |                  | 0.99             | 1.59              | -0.27            | 50 $\alpha$      | 1.25  | 1.62  | -0.19      | 50 $\alpha$ |
| 20 | Q  | -0.18                                 | 0.55             | 0.02             |                                 | 0.21             | 0.45             | -0.06                            | 10 $\alpha$      | -0.12            | 0.2               | -0.09            |                  | 0.04  | 0.18  | -0.04      |             |
| 21 | W  | 2                                     | -0.21            | 0.11             | 10 $\beta$                      | -0.22            | -0.54            | 0.07                             | 10 $\beta$       | -0.64            | -0.31             | -0.01            | 20 $\beta$       | -0.55 | -0.28 | 0.01       | 20 $\beta$  |
| 22 | L  | -0.44                                 | -0.11            | 0.18             | 20 $\beta$                      | 0.24             | -0.07            | -0.03                            |                  | -0.84            | -0.4              | 0.02             | 20 $\beta$       | -0.61 | -0.31 | 0.04       | 20 $\beta$  |
| 23 | Q  | -0.08                                 | 0.01             | 0.03             |                                 | -0.15            | -0.15            | -0.08                            | 10 $\beta$       | -0.45            | -0.3              | -0.06            | 20 $\beta$       | -0.2  | -0.21 | 0.12       | 10 $\beta$  |
| 24 | V  | -0.44                                 | -0.14            | 0.09             | 10 $\beta$                      | -0.29            | -0.17            | -0.02                            | 10 $\beta$       | -0.91            | -0.4              | -0.06            | 20 $\beta$       | -0.77 | -0.42 | -0.01      | 20 $\beta$  |
| 25 | D  | 0.09                                  | -0.23            | 0.13             | 10 $\beta$                      | 0.21             | 0.05             | 0                                |                  | 1.05             | 1.11              | -0.13            | 20 $\alpha$      | 1.08  | 1.11  | -0.13      | 20 $\alpha$ |
| 26 | L  | 0.08                                  | 0.04             | 0.06             |                                 | 0.94             | 0.5              | 0                                | 10 $\alpha$      | 0.11             | -0.17             | -0.06            |                  | 0.22  | -0.15 | -0.04      | 10 $\alpha$ |
| 27 | G  | 0.29                                  | 0.42             | --               | 10 $\alpha$                     | 0.08             | 0.28             | --                               |                  | -0.05            | 0.24              | --               |                  | 0.07  | 0.26  | --         |             |
| 28 | S  | -0.14                                 | 0.16             | 0.08             | 10 $\beta$                      | 0.19             | 0.32             | -0.01                            | 10 $\alpha$      | -0.39            | -0.26             | -0.03            | 10 $\beta$       | -0.3  | -0.24 | 0          | 10 $\beta$  |
| 29 | S  | -0.1                                  | 0.19             | 0.08             |                                 | 0.31             | 0.16             | 0.04                             |                  | -0.26            | -0.17             | -0.02            | 10 $\beta$       | -0.17 | -0.13 | 0          |             |
| 30 | K  | -0.22                                 | 0.13             | 0.06             | 10 $\beta$                      | 0.18             | -0.02            | 0.05                             |                  | -0.4             | -0.12             | -0.04            |                  | -0.14 | -0.06 | -0.01      |             |
| 31 | E  | 0.01                                  | -0.23            | 0.12             | 10 $\beta$                      | 0.21             | -0.24            | 0                                |                  | 0.31             | 0.53              | -0.07            | 10 $\alpha$      | 0.45  | 0.55  | -0.05      | 20 $\alpha$ |
| 32 | V  | -0.14                                 | 0.05             | 0.17             | 10 $\beta$                      | 0.47             | 0.42             | 0                                | 10 $\alpha$      | -0.34            | -0.16             | 0.01             | 10 $\beta$       | -0.31 | -0.19 | 0.01       | 10 $\beta$  |
| 33 | T  | -0.07                                 | 0.07             | 0.11             |                                 | -0.4             | 0.81             | -0.09                            | 20 $\alpha$      | -0.57            | 0.09              | -0.05            |                  | -0.34 | 0.14  | -0.02      |             |
| 34 | G  | -0.35                                 | -0.06            | --               |                                 | -0.26            | -0.17            | --                               | 10 $\beta$       | -0.6             | -0.13             | --               |                  | -0.37 | -0.06 | --         |             |
| 35 | I  | -0.09                                 | 0.05             | 0.08             |                                 | 0.91             | 0.61             | -0.09                            | 20 $\alpha$      | -0.27            | -0.23             | -0.03            | 10 $\beta$       | -0.14 | -0.24 | -0.01      | 10 $\beta$  |
| 36 | I  | -0.21                                 | -0.04            | 0.1              | 10 $\beta$                      | 0.59             | 0.34             | -0.05                            | 10 $\alpha$      | -0.41            | -0.55             | 0.01             | 20 $\beta$       | -0.36 | -0.55 | 0.02       | 20 $\beta$  |
| 37 | T  | -0.27                                 | 0.05             | 0.13             | 10 $\beta$                      | -0.73            | 0.27             | -0.08                            | 10 $\alpha$      | -0.68            | -0.14             | -0.04            | 10 $\beta$       | -0.66 | -0.17 | -0.03      | 10 $\beta$  |
| 38 | Q  | -0.16                                 | 0.2              | 0.06             | 10 $\beta$                      | 0.07             | 0.12             | 0.05                             |                  | -0.45            | -0.14             | -0.07            | 10 $\beta$       | -0.32 | -0.16 | -0.04      | 10 $\beta$  |
| 39 | G  | -0.08                                 | 0.04             | --               |                                 | -0.55            | -0.27            | --                               | 10 $\beta$       | -0.37            | -0.06             | --               |                  | -0.26 | -0.05 | --         |             |
| 40 | A  | -0.1                                  | 0.2              | 0.08             |                                 | 0.34             | 0.15             | -0.04                            | 10 $\alpha$      | -0.32            | -0.19             | -0.04            | 10 $\beta$       | -0.2  | -0.16 | -0.03      | 10 $\beta$  |
| 41 | R  | -0.45                                 | -0.2             | 0.08             | 20 $\beta$                      | -0.33            | -0.43            | 0.03                             | 20 $\beta$       | -0.78            | -0.55             | -0.1             | 20 $\beta$       | -0.51 | -0.46 | -0.04      | 20 $\beta$  |
| 42 | N  | 0.09                                  | -0.07            | 0.1              |                                 | 0.23             | -0.02            | 0.03                             |                  | -0.3             | -0.12             | 0                |                  | -0.28 | -0.16 | 0          | 10 $\beta$  |
| 43 | F  | -0.24                                 | 0.02             | 0                |                                 | 0.34             | 0.49             | 0.04                             |                  | -0.42            | -0.08             | -0.06            |                  | -0.31 | -0.09 | -0.05      |             |
| 44 | G  | 0.36                                  | 0.37             | --               | 10 $\alpha$                     | -0.14            | -0.11            | --                               |                  | -0.42            | -0.09             | --               |                  | -0.19 | -0.02 | --         |             |
| 45 | S  | -0.19                                 | 0.1              | -0.03            |                                 | 0.14             | 0.25             | -0.16                            |                  | -0.45            | -0.25             | -0.12            | 10 $\beta$       | -0.3  | -0.21 | -0.07      | 10 $\beta$  |
| 46 | V  | -0.4                                  | -0.08            | 0.15             | 20 $\beta$                      | 0.03             | -0.16            | 0.04                             | 10 $\beta$       | -0.68            | -0.35             | -0.01            | 20 $\beta$       | -0.41 | -0.29 | 0.05       | 20 $\beta$  |
| 47 | Q  | -0.36                                 | -0.1             | 0.1              | 20 $\beta$                      | -0.47            | -0.12            | -0.01                            |                  | -0.73            | -0.38             | 0.03             | 20 $\beta$       | -0.47 | -0.33 | 0.06       | 20 $\beta$  |
| 48 | F  | -1.08                                 | -4.65            | -0.02            | 50 $\beta$                      | -0.98            | -4.45            | -0.08                            | 50 $\beta$       | -1.38            | -4.74             | -0.07            | 50 $\beta$       | -1.24 | -4.72 | -0.04      | 50 $\beta$  |
| 49 | V  | -1.14                                 | 0.09             | 0.09             | 20 $\beta$                      | -1.43            | 0                | -0.07                            |                  | -1.84            | -0.4              | -0.03            | 20 $\beta$       | -1.81 | -0.42 | -0.03      | 20 $\beta$  |

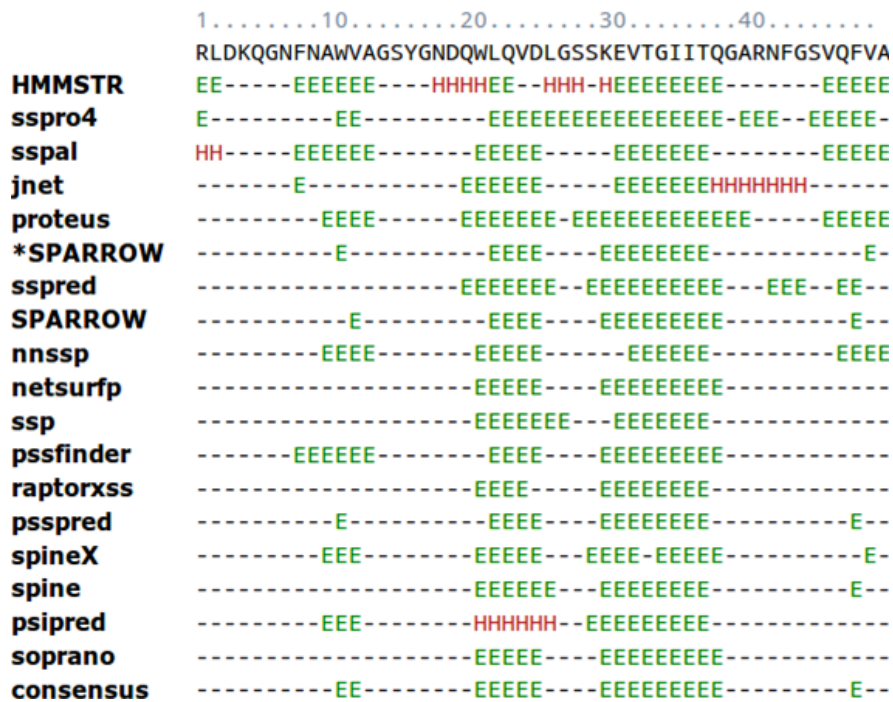

Figure S1. Secondary structure prediction results for human medin obtained using the Genesilico Metaserver<sup>6</sup> and the resulting consensus prediction (bottom row). Green E characters represent predicted  $\beta$ -structure, red H indicates predicted  $\alpha$ -helix.

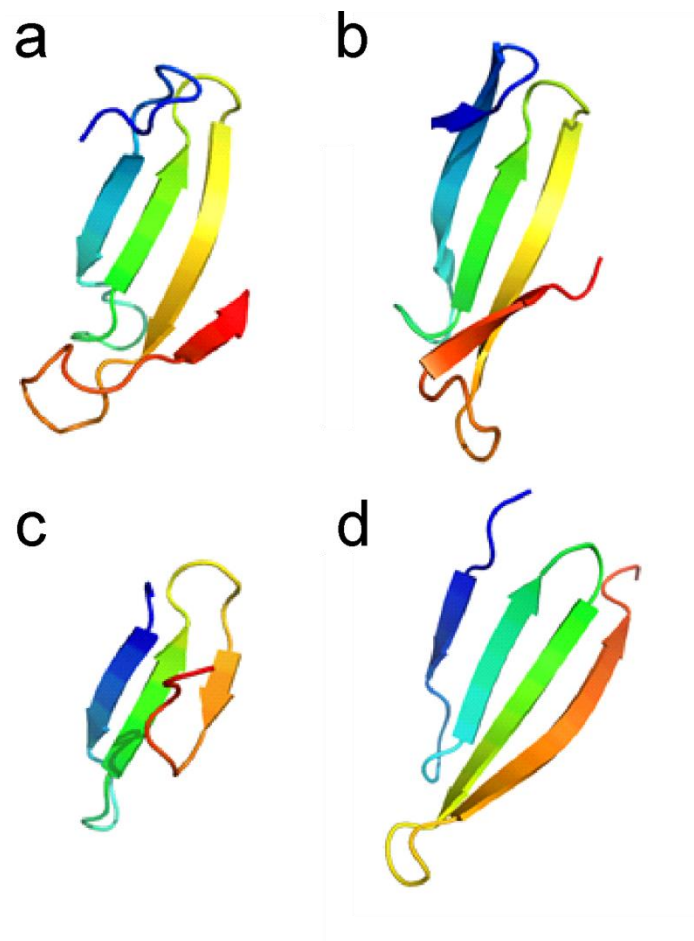

**Figure S2. Structure comparison of *ab initio* models of human medin and their respective nearest structural neighbours identified using eFOLD<sup>7</sup>.** (a) The medin model obtained from QUARK, (b) the top ROSETTA model (obtained using homologous fragments), (c) WW domain from human PRPF40A (PDB code 2dyf; unpublished) and (d) *Bacillus subtilis* YmzC protein (PDB code 3kvp; unpublished). Each structure is coloured from blue (N-terminus) to red (C-terminus).

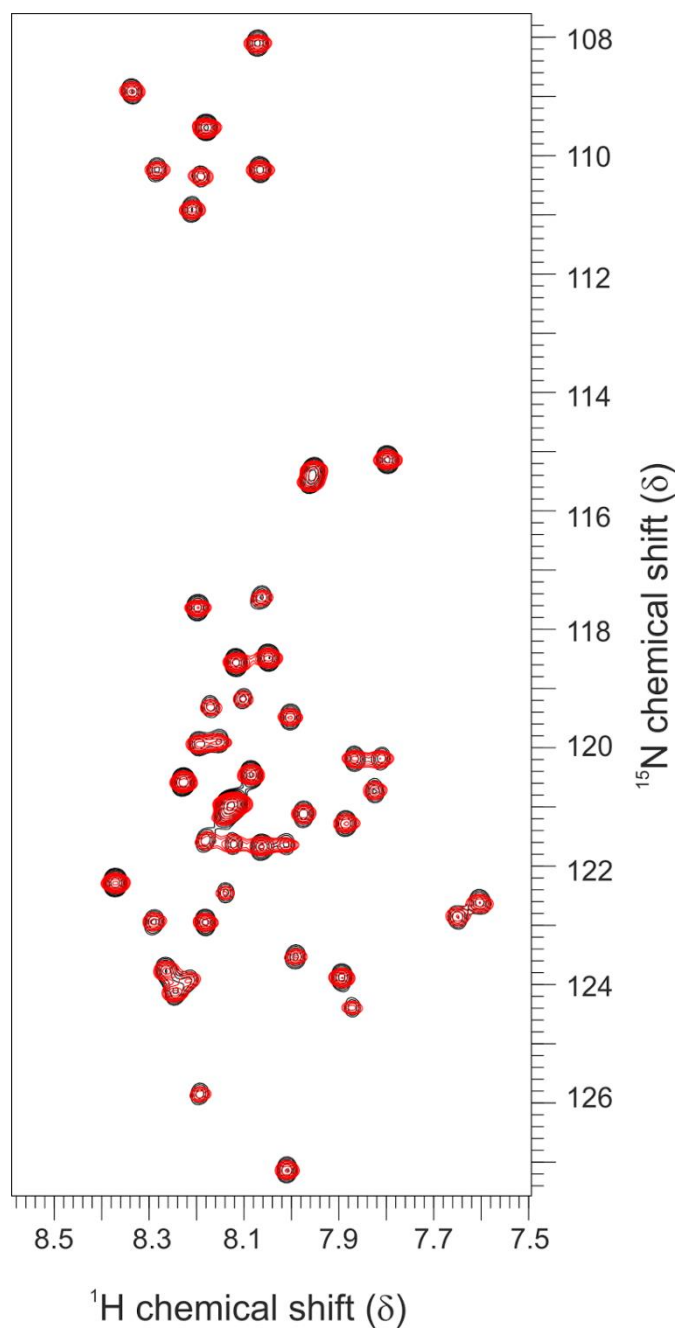

**Figure S3. Overlay of  $^1\text{H}$ - $^{15}\text{N}$  SOFAST HMQC spectra of medin at the start (black) and end (red) of assignment experiments showing negligible change over the time course of experiments.**

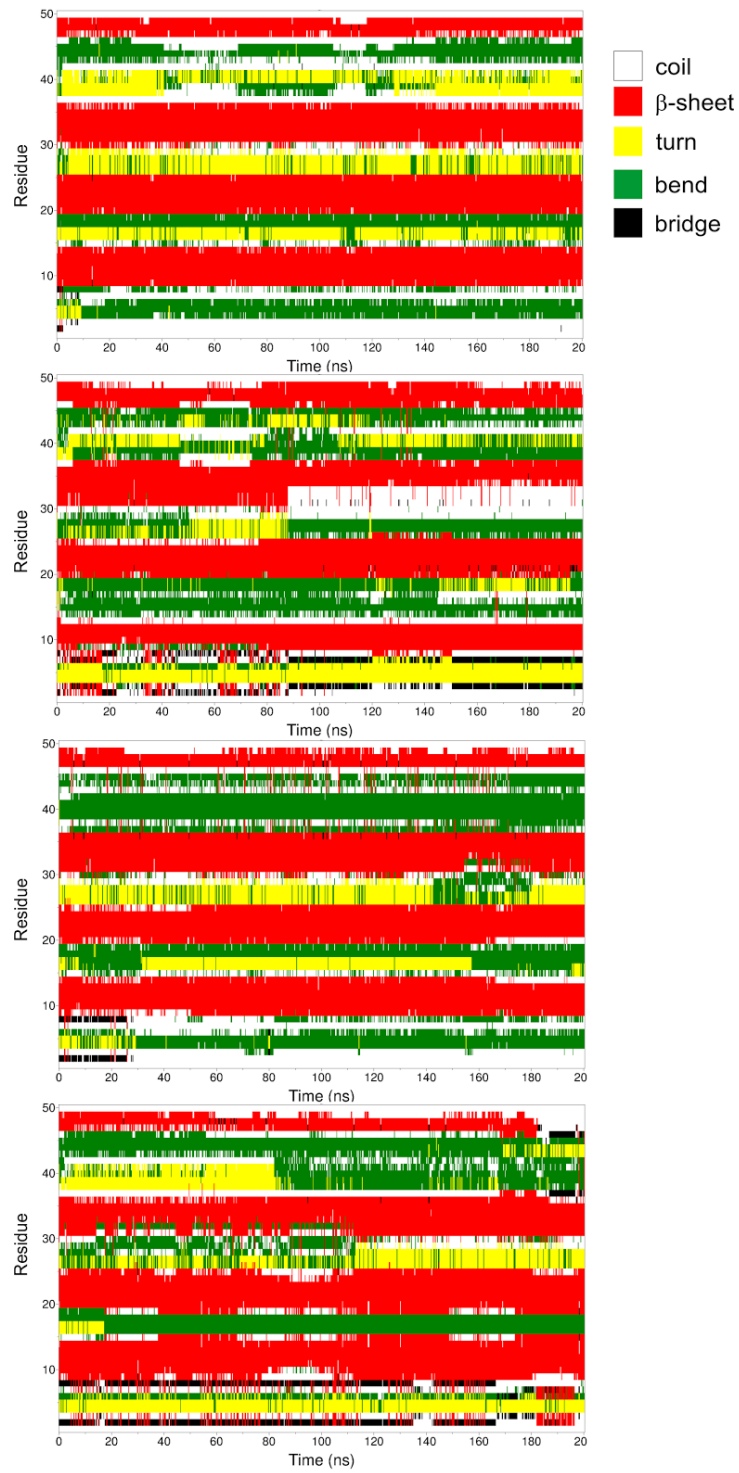

**Figure S4. Comparison of the secondary structure matrix of four replicate molecular dynamics trajectories over 200ns.** Snapshots each 250ps are color-coded according to secondary structure as assigned by DSSP.

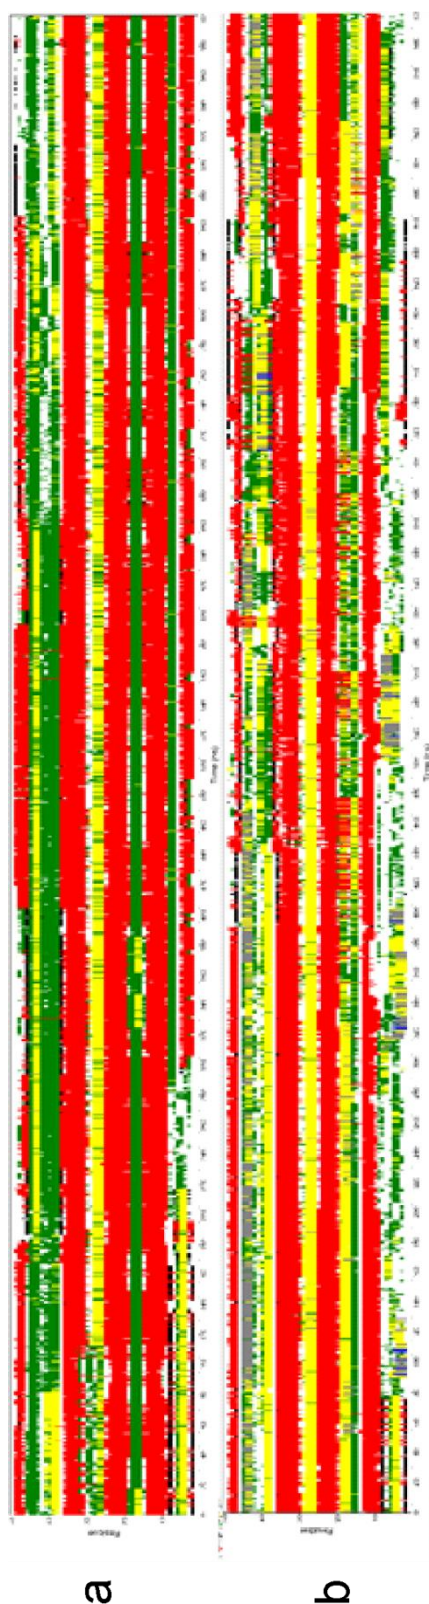

**Figure S5. Secondary structure matrix of extended 1 $\mu$ s molecular dynamics trajectories.** (a) with the OPLS-AA/L all-atom force field with SPC/E water model and (b) AMBER99SB force field and the TIP3P water model. Snapshots each 250ps are color-coded according to secondary structure as assigned by DSSP. This simulation demonstrates the transient nature of the C terminal strand where  $\beta$ -sheet (red) is the predominant state of residues from 47-49, with episodes of detachment exhibited by an absence of assigned secondary structure (white), and isolated  $\beta$ -bridges (black).

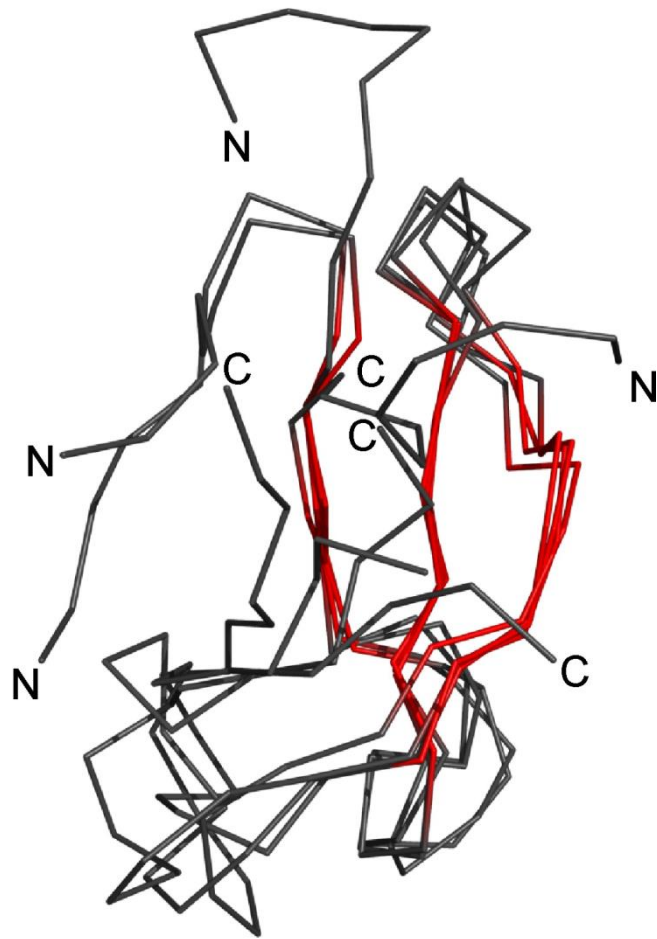

Figure S6. Ensemble of structures from the second MD simulation shown in Figure S6b in which the C-terminal strand is detached from the central sheet.



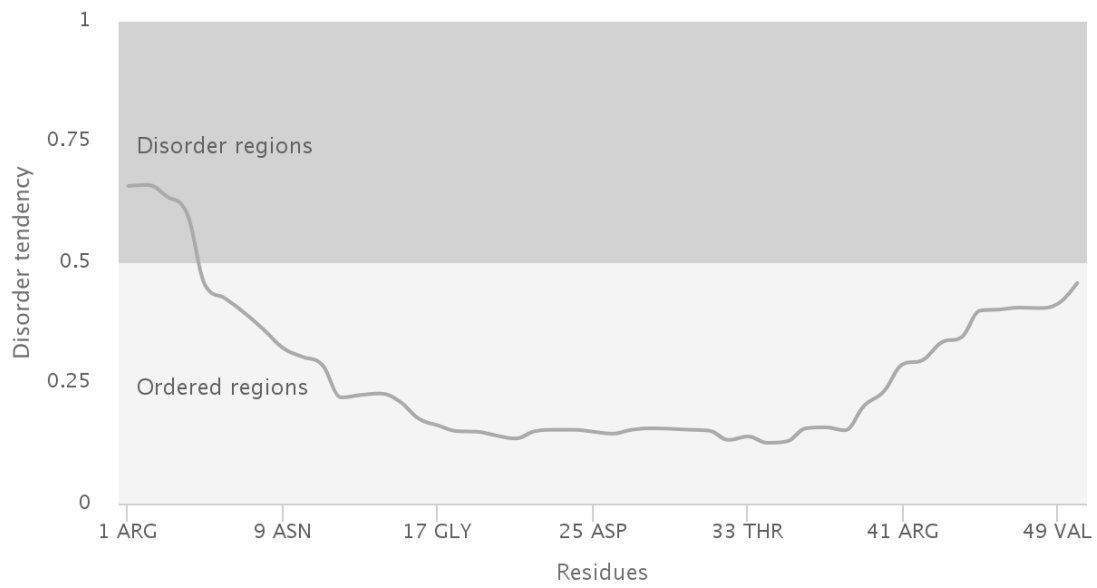

**Figure S7. Disorder prediction using MetaDisorderMD2 representing a consensus result based on 13 disorder predictors<sup>8</sup>.**

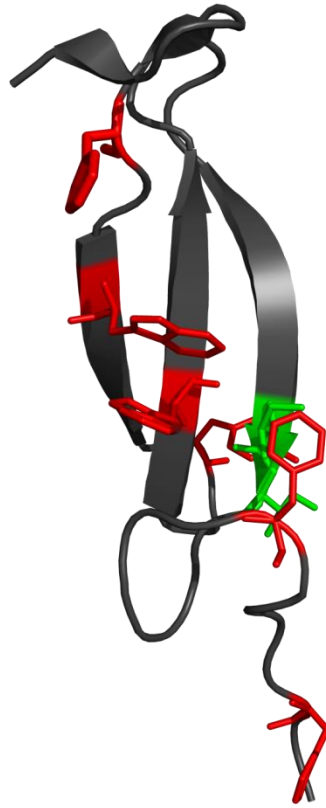

Figure S8. Cartoon representation of the 185ns snapshot highlighting the position of aromatic residues (red sticks) and isoleucine 35 and 36 described in our previous work<sup>9</sup> (green sticks) within model.

## Supplementary References

- 1 Tamiola, K., Acar, B. & Mulder, F. A. A. Sequence-specific random coil chemical shifts of intrinsically disordered proteins. *J. Am. Chem. Soc.* **132**, 18000-18003, (2010).
- 2 Vranken, W. F. *et al.* The CCPN data model for NMR spectroscopy: development of a software pipeline. *Proteins* **59**, 687-696, (2005).
- 3 Wishart, D. S. & Sykes, B. D. Chemical shifts as a tool for structure determination. *Methods Enzym.* **239**, 363-392, (1994).
- 4 Wang, Y. & Jardetzky, O. Probability-based protein secondary structure identification using combined NMR chemical-shift data. *Protein Sci.* **11**, 852-861, (2002).
- 5 Schwarzingher, S. *et al.* Sequence-dependent correction of random coil NMR chemical shifts. *J. Am. Chem. Soc.* **123**, 2970-2978, (2001).
- 6 Kurowski, M. A. & Bujnicki, J. M. GeneSilico protein structure prediction meta-server. *Nucleic Acids Res.* **31**, 3305-3307, (2003).
- 7 Krissinel, E. & Henrick, K. Secondary-structure matching (SSM), a new tool for fast protein structure alignment in three dimensions. *Acta Crystallogr. D Biol. Crystallogr.* **60**, 2256-2268, (2004).
- 8 Kozlowski, L. P. & Bujnicki, J. M. MetaDisorder: a meta-server for the prediction of intrinsic disorder in proteins. *BMC Bioinformatics* **13**, 1-11, (2012).
- 9 Davies, H. A., Madine, J. & Middleton, D. A. Comparisons with amyloid-beta reveal an aspartate residue that stabilizes fibrils of the aortic amyloid peptide medin. *J. Biol. Chem.* **290**, 7791-7803, (2015).
